# Supplementary material for: New prognosis biomarkers identified by dynamic proteomic analysis of colorectal cancer
Source: Royal Society of Chemistry journal article supplement (doi:10.1039/c2mb25286d), 2012-09-20
Supplement: c2mb25286d.pdf [file c2mb25286d.pdf]

S-Table 1. Clinical data of specimens for 2-D DIGE analysis.

| Sample No. | Gender | Age | Clinical stage | TNM grade | Location | Differentiation grade            |
|------------|--------|-----|----------------|-----------|----------|----------------------------------|
| 1          | F      | 61  | I              | T2N0M0    | colon    | poorly—moderately differentiated |
| 2          | F      | 60  | I              | T1N0M0    | colon    | well differentiated              |
| 3          | F      | 43  | I              | T2N0M0    | rectal   | well--moderately                 |
| 4          | F      | 51  | I              | T2N0M0    | rectal   | well--moderately                 |
| 5          | M      | 54  | I              | T2N0M0    | rectal   | well--moderately                 |
| 6          | F      | 57  | IIA            | T3N0M0    | colon    | Well differentiated              |
| 7          | F      | 58  | IIA            | T3N0M0    | colon    | Moderately differentiated        |
| 8          | F      | 77  | IIA            | T3N0M0    | rectal   | Moderately differentiated        |
| 9          | F      | 68  | IIA            | T3N0M0    | colon    | Well differentiated              |
| 10         | F      | 52  | IIA            | T3N0M0    | colon    | Well differentiated              |
| 11         | F      | 65  | IIIA           | T1N1M0    | rectal   | Well differentiated              |
| 12         | F      | 41  | IIIC           | T4N2M0    | colon    | signet-ring cell carcinoma       |
| 13         | F      | 53  | IIIA           | T2N1M0    | rectal   | Well differentiated              |
| 14         | F      | 68  | IIIC           | T3N2M0    | rectal   | Moderately differentiated        |
| 15         | M      | 31  | IIIC           | T3N2M0    | rectal   | Mucinous adenocarcinoma          |
| 16         | F      | 74  | IV             | T3N0M1    | colon    | Moderately differentiated        |
| 17         | F      | 67  | IV             | T3N0M1    | rectal   | well--moderately                 |
| 18         | F      | 44  | IV             | T3N0M1    | colon    | moderately --well                |
| 19         | M      | 35  | IV             | T3N0M1    | colon    | well--moderately                 |
| 20         | M      | 50  | IV             | T3N0M1    | rectal   | moderately                       |
