# Supplementary material for: New prognosis biomarkers identified by dynamic proteomic analysis of colorectal cancer
Source: Royal Society of Chemistry journal article supplement (doi:10.1039/c2mb25286d), 2012-09-20
Supplement: c2mb25286d_3.pdf [file c2mb25286d_3.pdf]

S-Table 3. Experimental design for tissue samples in 2D DIGE analysis.

| Gel    | Cy2               | Cy3       | Cy5       |
|--------|-------------------|-----------|-----------|
| Gel-1  | internal standard | I-1       | II-1      |
| Gel-2  | internal standard | III-3     | IV-4      |
| Gel-3  | internal standard | II-2      | III-2     |
| Gel-4  | internal standard | III-1     | I-2       |
| Gel-5  | internal standard | IV-5      | Control-5 |
| Gel-6  | internal standard | IV-2      | II-3      |
| Gel-7  | internal standard | I-3       | IV-1      |
| Gel-8  | internal standard | III-4     | Control-3 |
| Gel-9  | internal standard | II-4      | Control-2 |
| Gel-10 | internal standard | Control-1 | I-4       |
| Gel-11 | internal standard | IV-3      | Control-4 |
| Gel-12 | internal standard | III-5     | II-5      |
| Gel-13 | internal standard | I-5       | III-4     |
